# Supplementary material
Source: Royal Society of Chemistry journal article supplement (doi:10.1039/d6fo00704j)

## Supplement: Raw images of Western blots

### Experiment 1

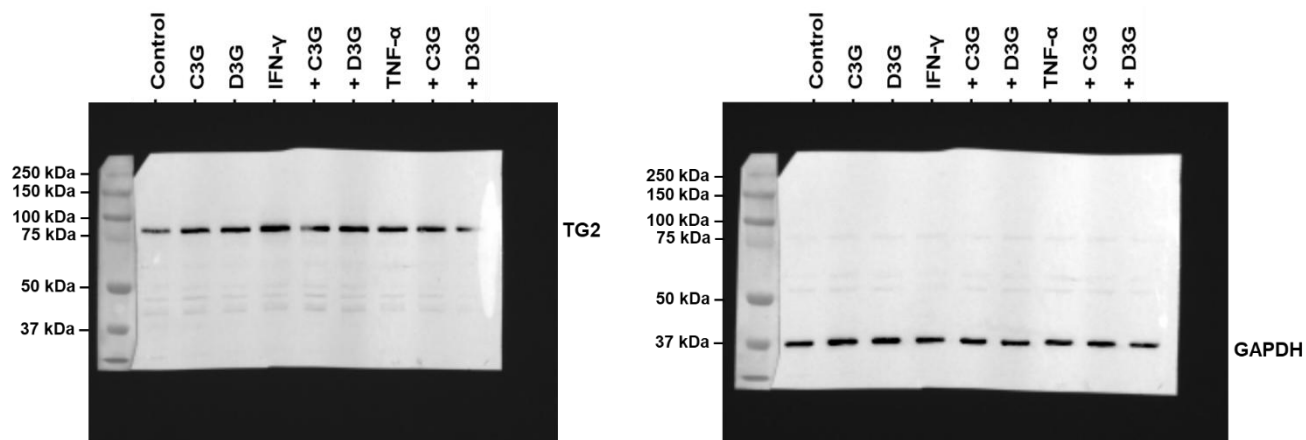

### Experiment 2

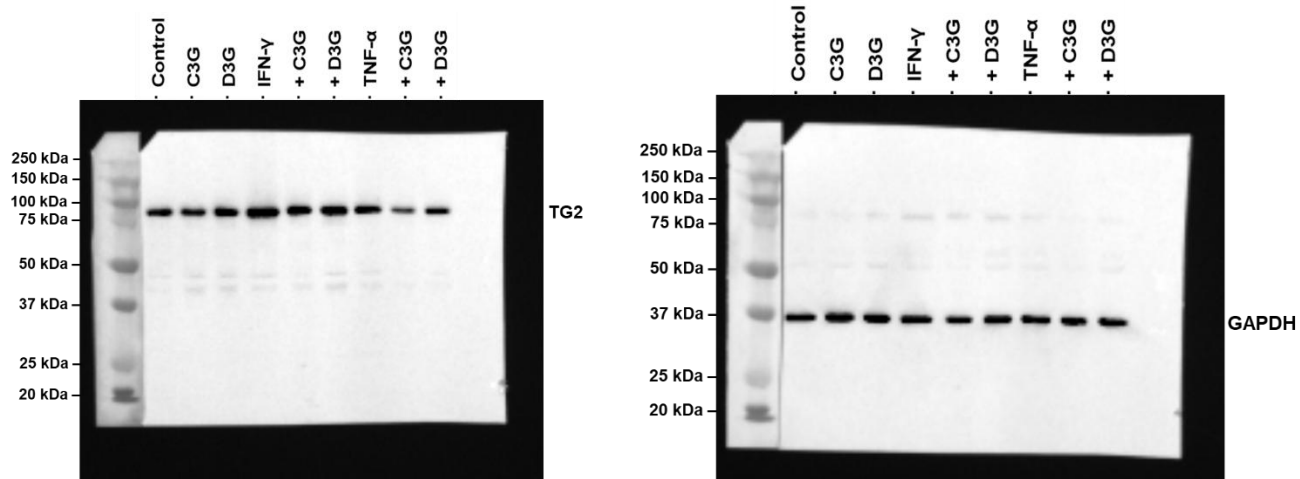

### Experiment 3

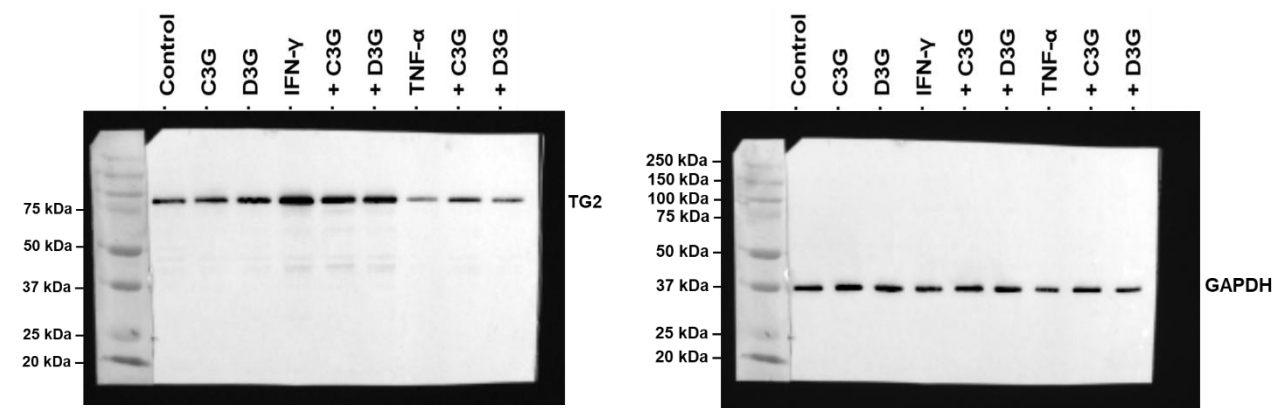

**Experiment 4**

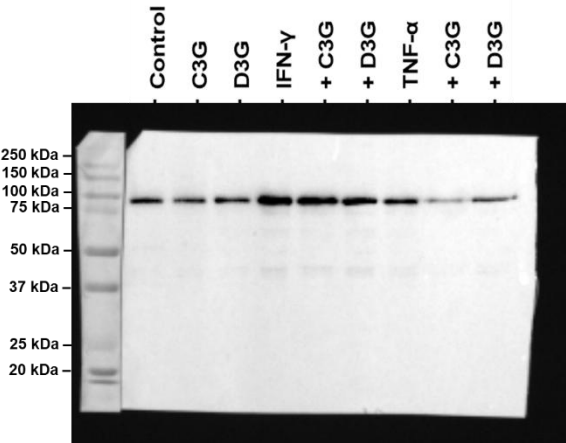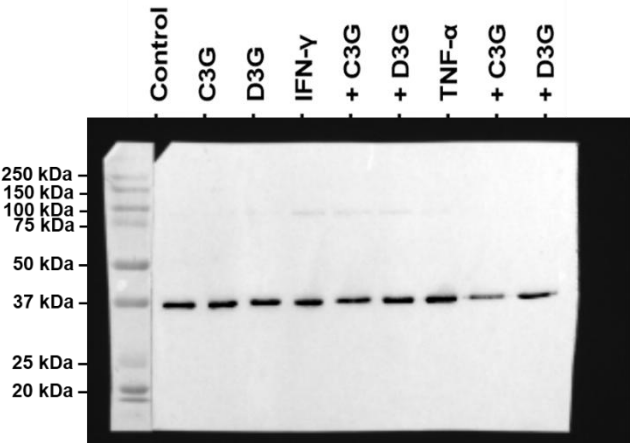

Supplement: d6fo00704j1.pdf [file d6fo00704j1.pdf]
